# Supplementary material
Source: PubMed Central journal article supplement (PMC5748381)
Supplement: NIHMS893890-supplement-Appendix.pdf [file NIHMS893890-supplement-Appendix.pdf]

## Appendix: Task-Specific Movement Pattern Training

### Standing

#### Key Concepts of Optimal Alignment/Movement

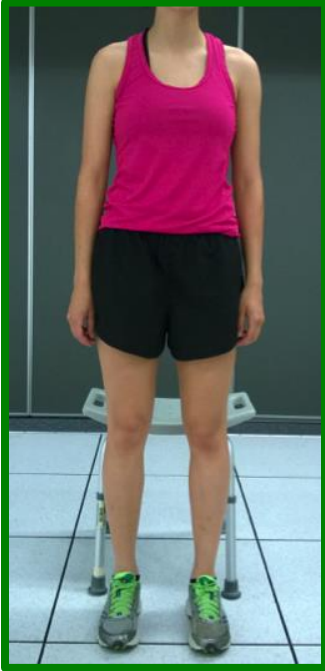

- Unlocked knees
- Knees apart from one another
- Neutral pelvis

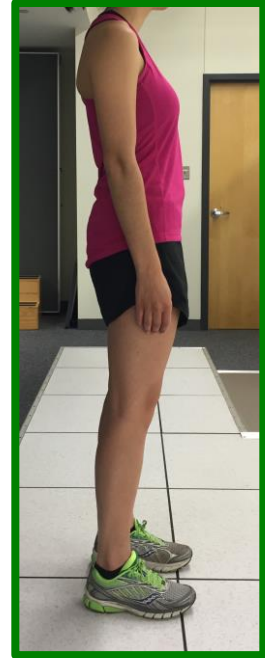

#### Alignment/Movement Error

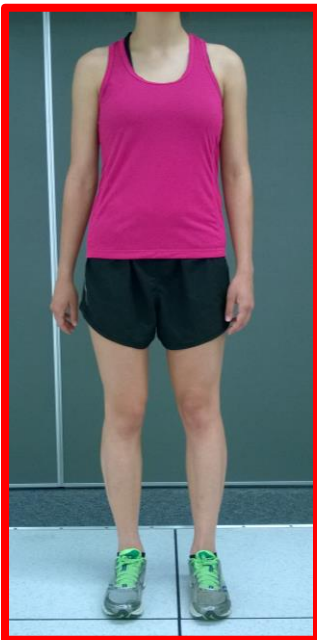

- Knees turned in
- Knees together

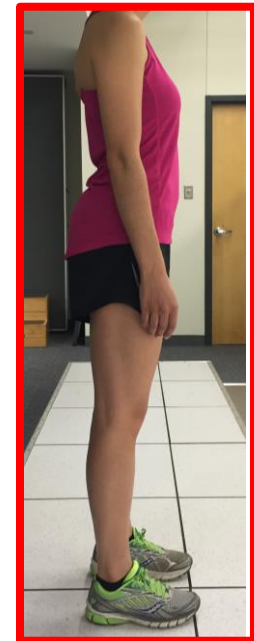

- Knees hyperextended
- Anterior pelvic tilt

Key: Correct

Incorrect

## Sitting

### Key Concepts of Optimal Alignment/Movement

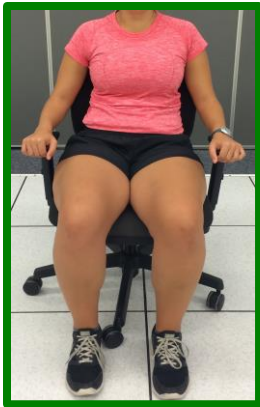

- Knee under hips
- Feet under knees

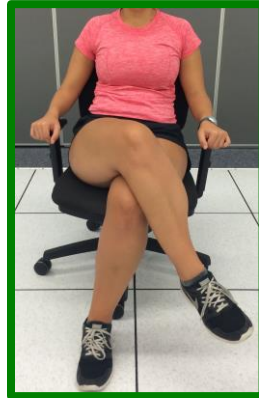

Top Leg:

- Knee outside foot

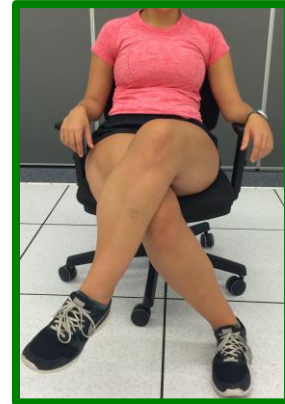

Bottom Leg:

- Knee outside foot

### Alignment/Movement Errors

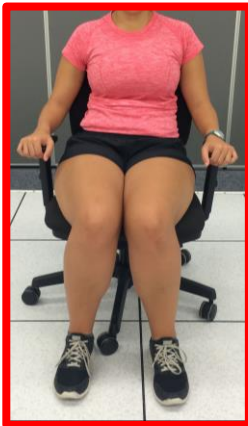

- Knees inside feet (example 1)

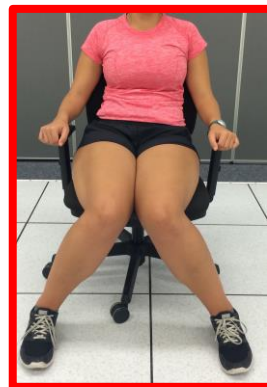

- Knees inside feet (example 2)

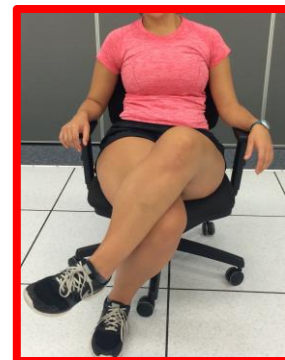

Bottom Leg:

- Knee inside foot

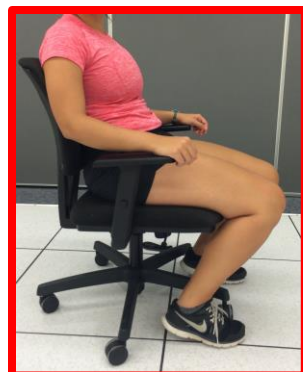

- Too much knee flexion (Feet behind knees)

## Single Limb Stance

### Key Concepts of Optimal Alignment/Movement

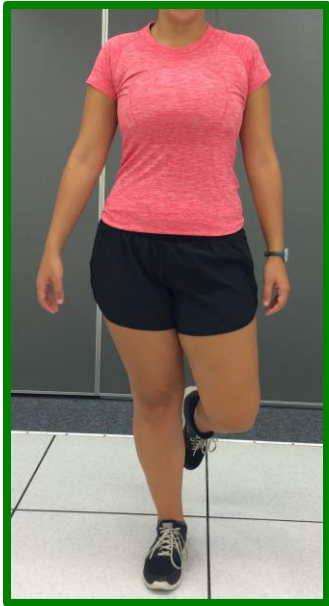

- Hip aligned over knee
- Knee aligned over little toes
- Shoulders level
- Pelvis level

### Alignment/Movement Errors

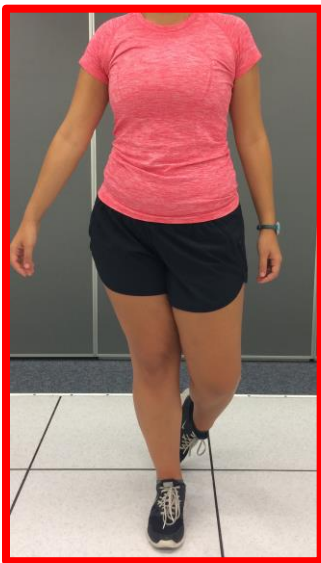

- Knee turned in

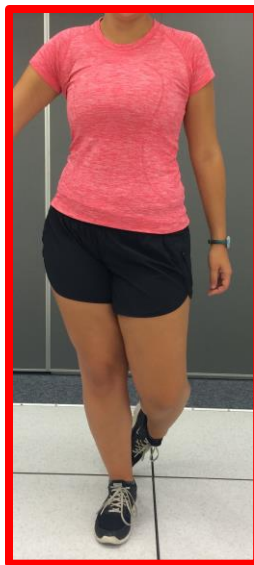

- Hips not level

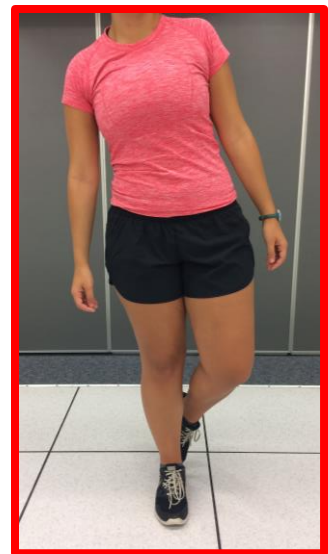

- Shoulders not level

### Examples: Task Practice Conditions

| Variable | Progression                                                                                              | Downgrade                                                                                      |
|----------|----------------------------------------------------------------------------------------------------------|------------------------------------------------------------------------------------------------|
| Speed    | <ul style="list-style-type: none"><li>• Move quickly to one leg</li><li>• Maintain longer hold</li></ul> | <ul style="list-style-type: none"><li>• Weight shift without lifting uninvolved foot</li></ul> |
| Surface  | <ul style="list-style-type: none"><li>• Stand on unstable surface (e.g. foam cushion)</li></ul>          | <ul style="list-style-type: none"><li>• Allow hand support</li></ul>                           |

## Single Limb Squat

### Key Concepts of Optimal Alignment/Movement

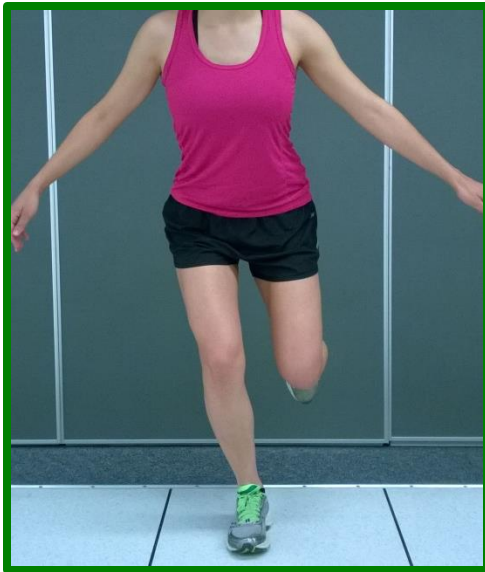

- Hip aligned over knee
- Knee aligned over little toes
- Shoulders level
- Pelvis level

### Alignment/Movement Errors

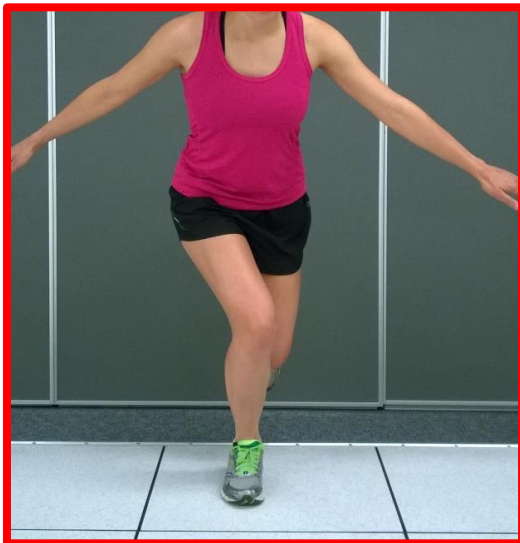

- Knee turned in
- Knee inside foot

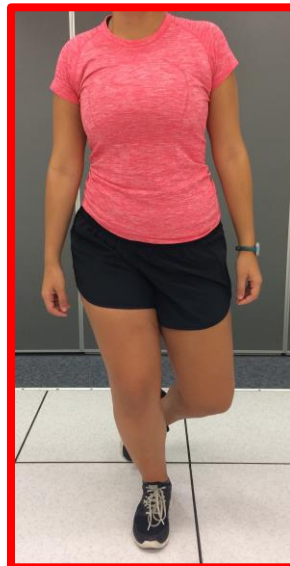

- Hips not level

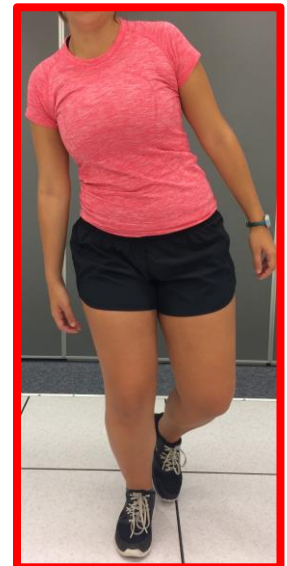

- Shoulders not level

### Examples: Task Practice Conditions

| Variable | Progression                                                                                       | Downgrade                                                                  |
|----------|---------------------------------------------------------------------------------------------------|----------------------------------------------------------------------------|
| Speed    | <ul style="list-style-type: none"> <li>• Increase speed of squat</li> </ul>                       | <ul style="list-style-type: none"> <li>• Slow controlled motion</li> </ul> |
| Surface  | <ul style="list-style-type: none"> <li>• Stand on unstable surface (e.g. foam cushion)</li> </ul> | <ul style="list-style-type: none"> <li>• Allow hand support</li> </ul>     |

## Sitting Down in (Standing Up from) a Chair

### Key Concepts of Optimal Alignment/Movement

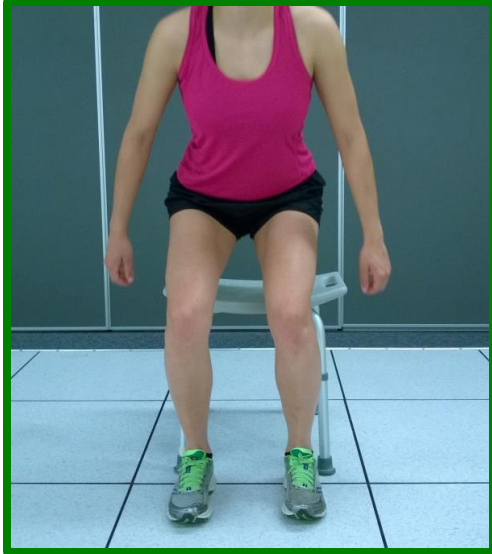

- Hips aligned over knees
- Knees aligned over little toes
- Shoulders level
- Pelvis level

### Alignment/Movement Errors

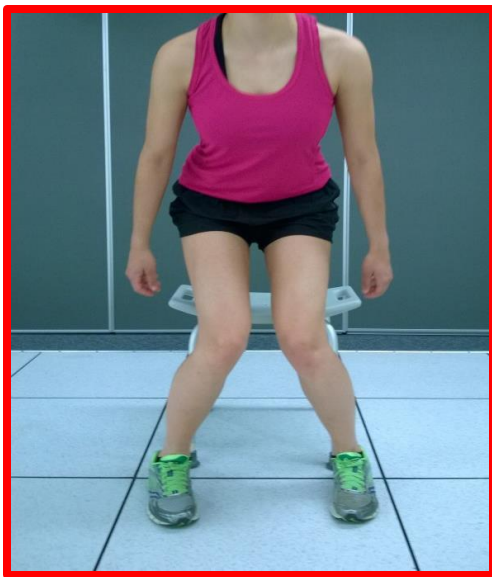

- Knees turned in
- Knees inside feet

### Examples: Task Practice Conditions

| <b>Variable</b>          | <b>Progression</b>                                                               | <b>Downgrade</b>                                                         |
|--------------------------|----------------------------------------------------------------------------------|--------------------------------------------------------------------------|
| Speed                    | <ul style="list-style-type: none"><li>• Increase speed of movement</li></ul>     | <ul style="list-style-type: none"><li>• Slow controlled motion</li></ul> |
| Surface                  | <ul style="list-style-type: none"><li>• Soft (e.g. outdoor/camp chair)</li></ul> | <ul style="list-style-type: none"><li>• Sturdy bench/chair</li></ul>     |
| Distance/Range of Motion | <ul style="list-style-type: none"><li>• Lower seat height</li></ul>              | <ul style="list-style-type: none"><li>• Raise seat height</li></ul>      |

## Ascending Stairs

### Key Concepts of Optimal Alignment/Movement

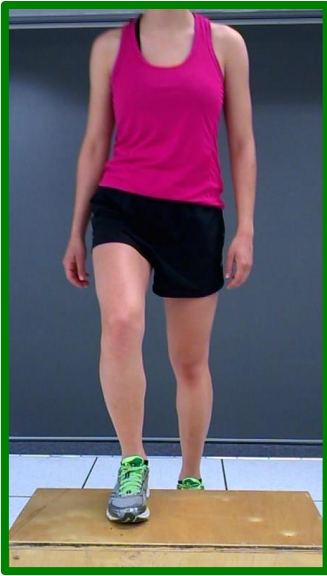

- Hip aligned over knee
- Knee aligned over little toes
- Shoulders level
- Pelvis level

### Alignment/Movement Errors

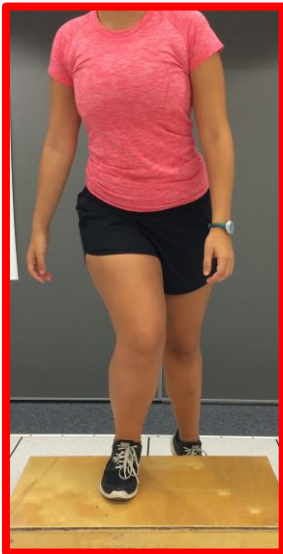

- Knee inside foot

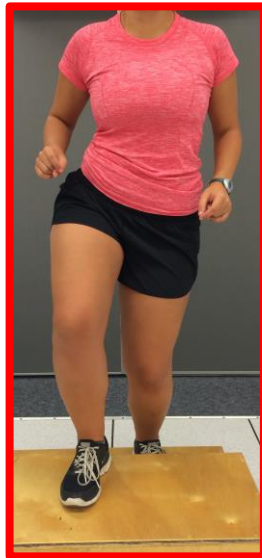

- Hips not level

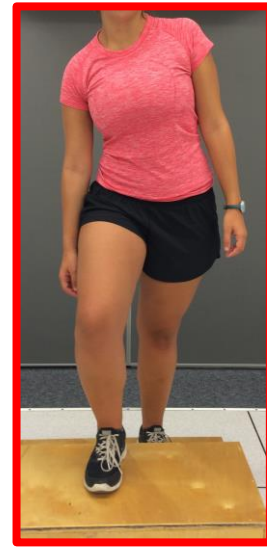

- Shoulders not level

### Examples: Task Practice Conditions

| Variable                 | Progression                                                                 | Downgrade                                                                  |
|--------------------------|-----------------------------------------------------------------------------|----------------------------------------------------------------------------|
| Speed                    | <ul style="list-style-type: none"> <li>• Increase movement speed</li> </ul> | <ul style="list-style-type: none"> <li>• Slow controlled motion</li> </ul> |
| Surface/Environment      | <ul style="list-style-type: none"> <li>• Carrying items</li> </ul>          | <ul style="list-style-type: none"> <li>• Hand support/railing</li> </ul>   |
| Distance/Range of Motion | <ul style="list-style-type: none"> <li>• Increase step height</li> </ul>    | <ul style="list-style-type: none"> <li>• Decrease step height</li> </ul>   |

## Descending Stairs

### Key Concepts of Optimal Alignment/Movement

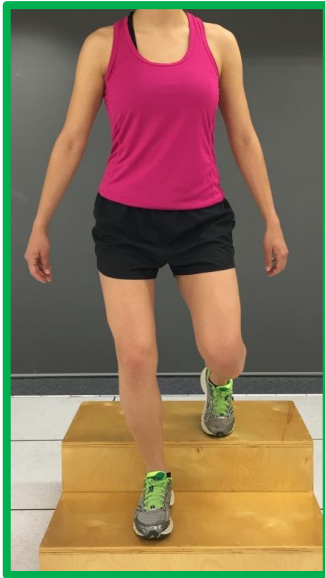

- Hip aligned over knee
- Knee aligned over little toe
- Shoulders level
- Pelvis level

### Alignment/Movement Errors

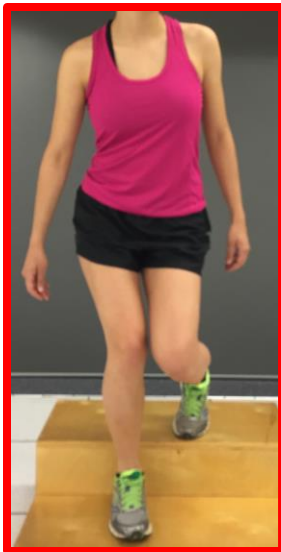

- Knee inside foot

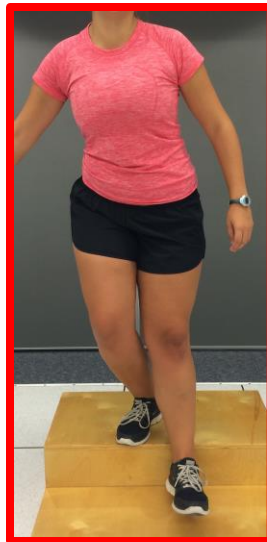

- Hips not level

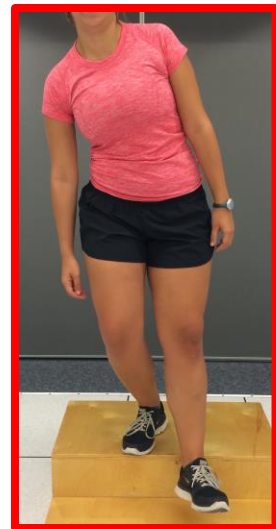

- Shoulders not level

### Examples: Task Practice Conditions

| Variable                 | Progression                                                               | Downgrade                                                                |
|--------------------------|---------------------------------------------------------------------------|--------------------------------------------------------------------------|
| Speed                    | <ul style="list-style-type: none"><li>• Increase movement speed</li></ul> | <ul style="list-style-type: none"><li>• Slow controlled motion</li></ul> |
| Surface/Environment      | <ul style="list-style-type: none"><li>• Carrying items</li></ul>          | <ul style="list-style-type: none"><li>• Hand support/railing</li></ul>   |
| Distance/Range of Motion | <ul style="list-style-type: none"><li>• Increase step height</li></ul>    | <ul style="list-style-type: none"><li>• Decrease step height</li></ul>   |

## Running

### Key Concepts of Optimal Alignment/Movement

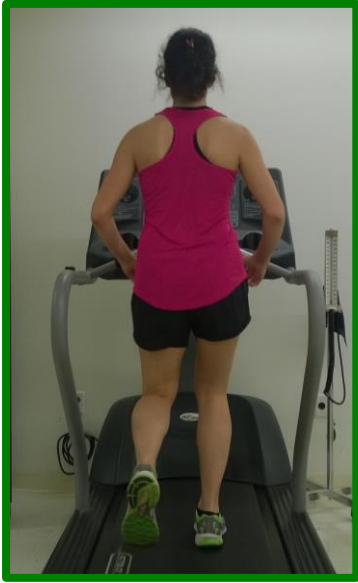

- Unlocked knees
- Knees apart from one another
- Neutral pelvis (no dropping to one side)
- No trunk lean or rotation
- Arm does not cross body when swinging

### Alignment/Movement Errors

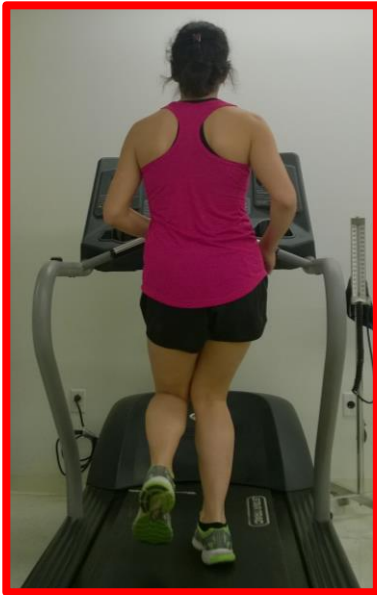

- Knees close together or touching
- Hips not level
- Trunk leans to side or rotates
- Arm crosses body when swinging

### Examples: Task Practice Conditions

| Variable            | Progression                                                              | Downgrade                                                                 |
|---------------------|--------------------------------------------------------------------------|---------------------------------------------------------------------------|
| Speed               | <ul style="list-style-type: none"><li>• Increase running speed</li></ul> | <ul style="list-style-type: none"><li>• Decrease running speed</li></ul>  |
| Surface/Environment | <ul style="list-style-type: none"><li>• Add/increase incline</li></ul>   | <ul style="list-style-type: none"><li>• Remove/decrease incline</li></ul> |
| Time                | <ul style="list-style-type: none"><li>• Increase time</li></ul>          | <ul style="list-style-type: none"><li>• Decrease time</li></ul>           |
